# Supplementary material
Source: PubMed Central journal article supplement (PMC6669288)

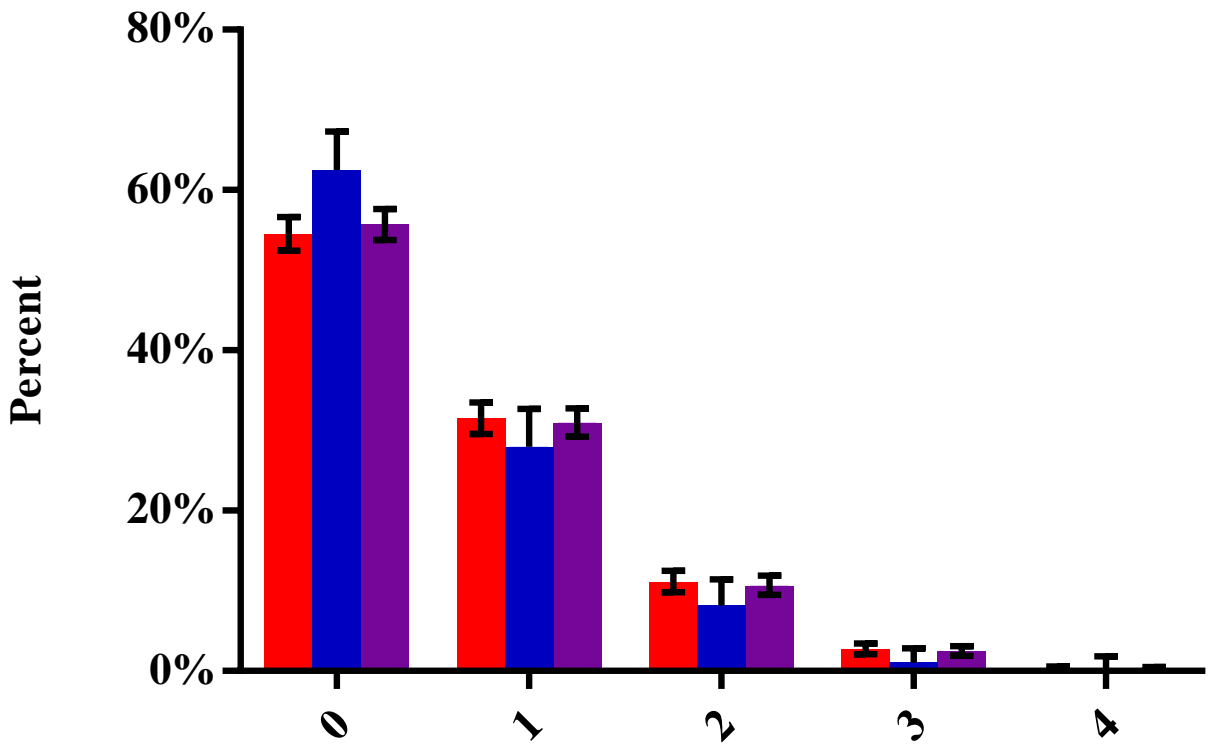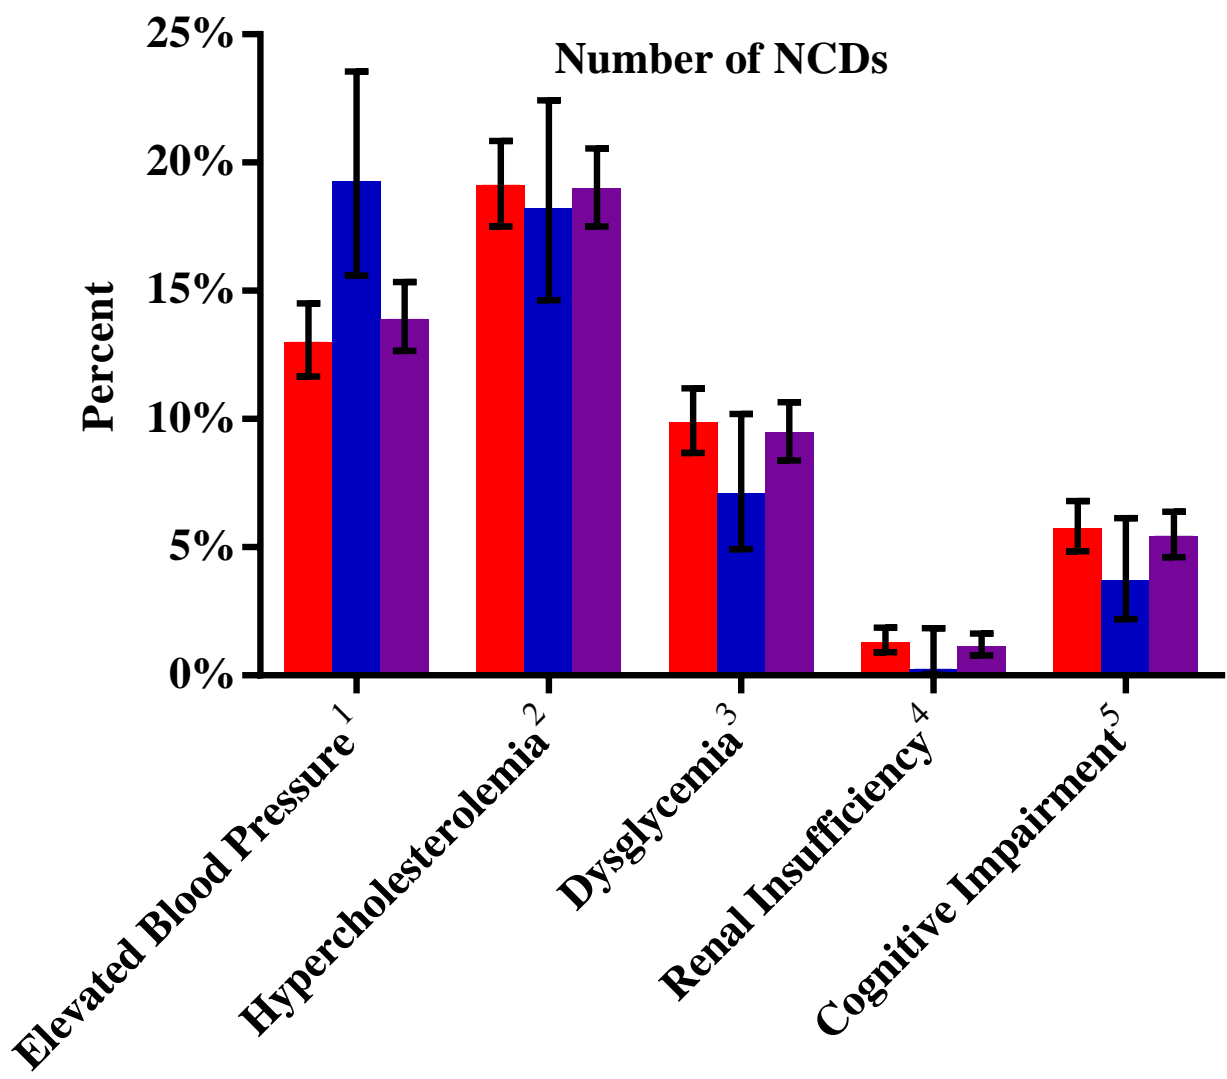

Supplement: ciy981_suppl_supplementary_figure.pdf [file ciy981_suppl_supplementary_figure.pdf]
